# Supplementary material for: Electrospray Deposition of Cellulose Nanofibers on Paper: Overcoming the Limitations of Conventional Coating
Source: MDPI journal article supplement (doi:10.3390/nano12010079), 2021-12-29
Supplement: s1 [file s1]

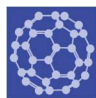

## Supplementary Materials

# Electrospray Deposition of Cellulose Nanofibers on Paper: Overcoming the Limitations of Conventional Coating

Quim Tarrés, Roberto Aguado \*, M. Àngels Pèlach, Pere Mutjé and Marc Delgado-Aguilar

LEPAMAP-PRODIS Research Group, University of Girona, M Aurèlia Capmany, n°61, 17003 Girona, Spain; joaquimagusti.tarres@udg.edu (Q.T.); angels.pelach@udg.edu (M.À.P.); pere.mutje@udg.edu (P.M.); m.delgado@udg.edu (M.D.-A.)

\* Correspondence: roberto.aguado@udg.edu

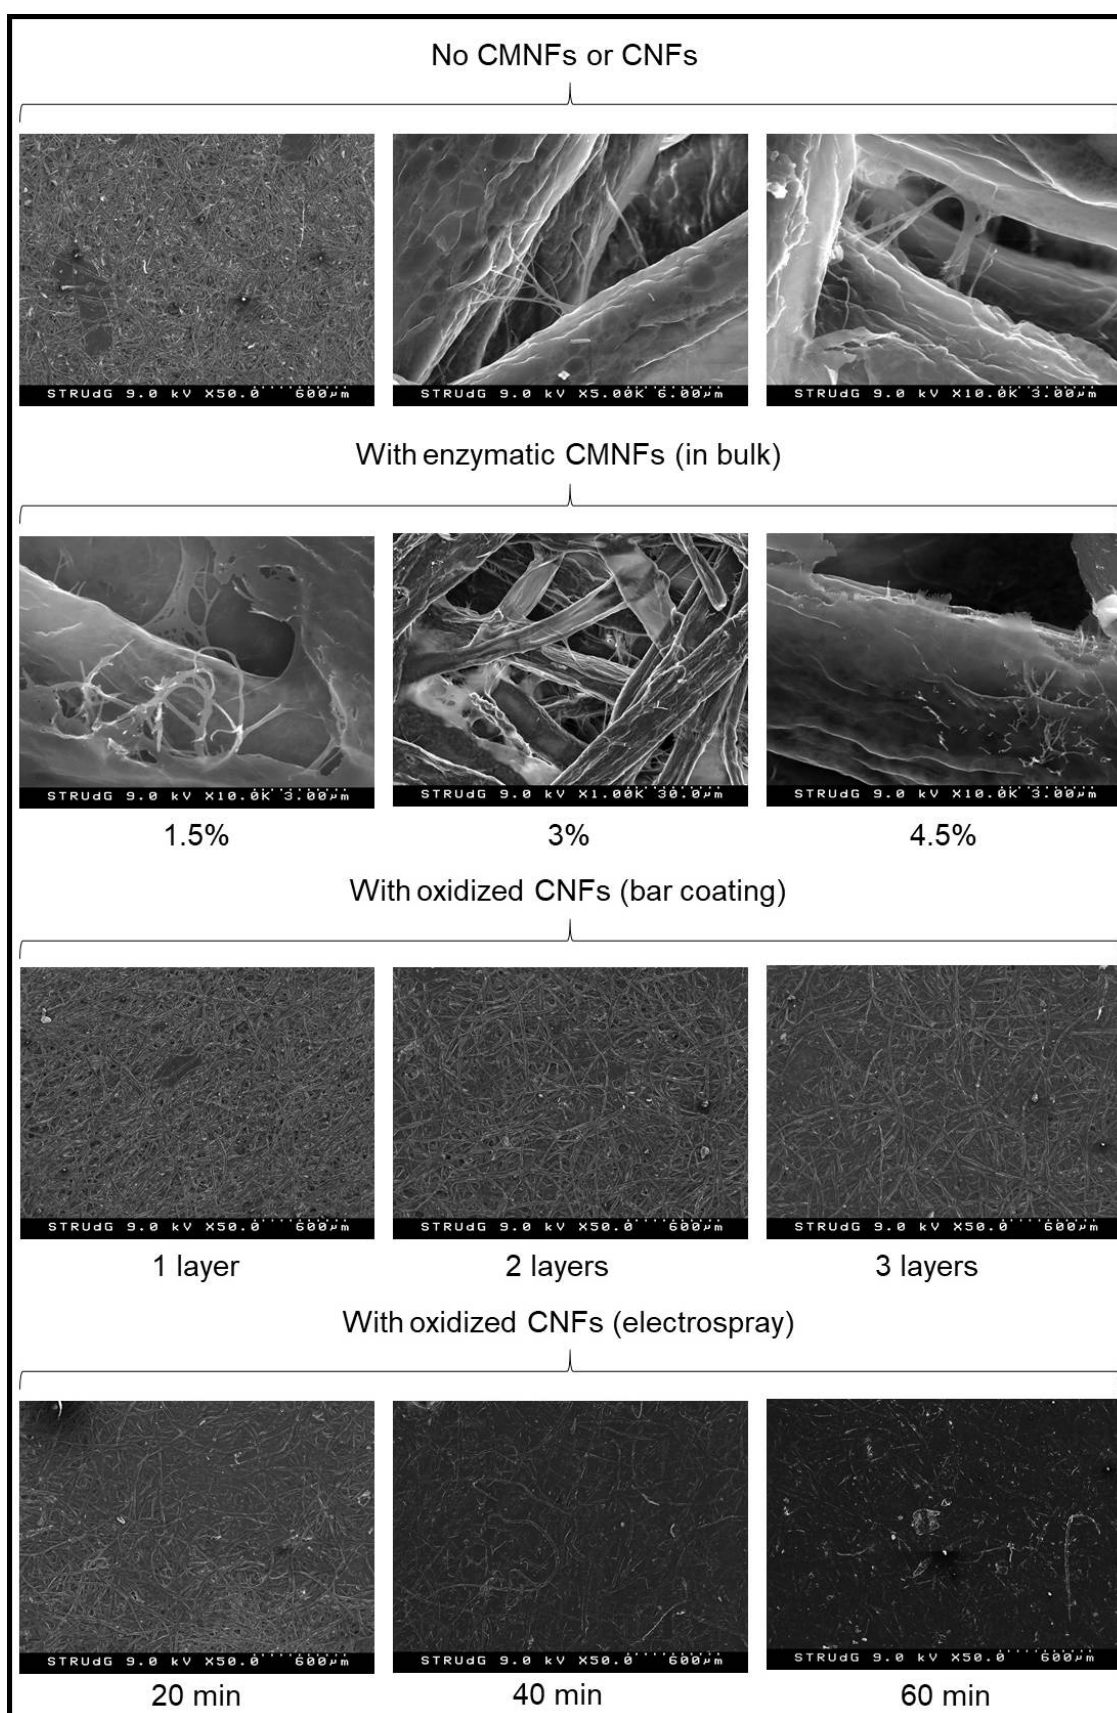

Figure S1. Additional micrographs.
